# Supplementary material
Source: PubMed Central journal article supplement (PMC6556576)

## Supplement

Text S1. Brief instructions for supplementary information files

1. Supplement.pdf: Showing supplement Table S1, Figure S1-S3 and their figure legends, and description of Movie 1-8;
2. 1.IMAP-Beating.mpg, 2.DMSO-Beating1.mpg: Showing spontaneous beating of iCMs derived from neonatal cardiac fibroblasts (NCFs) in MGT+IMAP group or MGT+DMSO group;
3. 3.IMAP-Rhod3.mpg, 4.DMSO-Rhod3.mpg: Showing calcium transient activities in MGT+IMAP group or MGT+DMSO group using Rhod3 staining;
4. 5.IMAP-White-Beating.mpg, 6.IMAP-Green-Beating.mpg: Lineage-tracing system showing spontaneous beating of iCMs (green) derived from neonatal cardiac fibroblasts (NCFs) in MGT+IMAP group under bright field and fluorescence microscope.
5. 7.IMAP Ca<sup>2+</sup>.mpg, 8.DMSO Ca<sup>2+</sup>.mpg: Showing calcium transient activities in MGT+IMAP group or MGT+DMSO group using  $\alpha$ MHC-Cre/Rosa26A-Flox-Stop-Flox-GCaMP3 NCFs.

Table S1. Primers used in qPCR.

| Genes          | Forward Primer          | Backward Primer         |
|----------------|-------------------------|-------------------------|
| Tnnt2          | CTGAGACAGAGGAGGCCAAC    | ACCAAGTTGGGCATGAAGAG    |
| Actn2          | CATCGAGGAGGATTTTCAGGAAC | CAATCTTGTGGAACCGCATTTT  |
| Myh6           | GCCCAGTACCTCCGAAAGTC    | GCCTTAACATACTCCTCCTTGTC |
| Ryr2           | ACGGCGACCATCCACAAAG     | AAAGTCTGTTGCCAAATCCTTCT |
| Col1a1         | GGTGAGCCTGGTCAAACGG     | ACTGTGTCCTTTCACGCCTTT   |
| Col1a2         | GCTCCTCTTAGGGGCCACT     | CCACGTCTCACCATTGGGG     |
| Il6            | TAGTCCTTCCTACCCCAATTTCC | TTGGTCCTTAGCCACTCCTTC   |
| Tnf            | GACGTGGAAGTGGCAGAAGA    | ACTGATGAGAGGGAGGCCAT    |
| Ccl2           | TTAAAAACCTGGATCGGAACCAA | GCATTAGCTTCAGATTTACGGGT |
| Ptgs2          | TGAGCAACTATTCCAAACCAGC  | GCACGTAGTCTTCGATCACTATC |
| $\beta$ -actin | GGCTGTATTCCCCTCCATCG    | CCAGTTGGTAACAATGCCATGT  |

Figure S1. IMAP-enhanced cardiac reprogramming in both MEFs and NCFs

(A) Representative images of immunofluorescence staining and (B) Quantification of cardiac markers  $\alpha$ -MHC-GFP (Green) and  $\alpha$ -actinin (Red) in fibroblasts (Control) or cells treated with either MGT+DMSO or MGT+IMAP for two weeks. (scale bar 500 $\mu$ m) (C) Representative images of immunofluorescence staining including enlarged image showing sarcomere formation (scale bar 200 $\mu$ m) of iCMs and (D) Quantification of cardiac markers  $\alpha$ -MHC-GFP (Green) and  $\alpha$ -actinin (Red) in NCFs (Control) or cells treated with either MGT+DMSO or MGT+IMAP for two weeks. (scale bar 500 $\mu$ m) (E) Representative images of immunofluorescence staining of cardiac markers  $\alpha$ -actinin and cTnT treated with either MGT+DMSO or MGT+IMAP in NCFs. (scale bar 2.0mm) Error bars indicate mean  $\pm$  s.e.m.; \*\*P<0.01, \*\*\*\*P<0.0001 compared with MGT+DMSO group.

Figure S2. RNA-sequencing data in MEFs showed significant changes of gene expression profiles

(A) Heat map showing differential expression of representative cardiac and fibroblast related genes among MEFs (Control), MGT+DMSO and MGT+IMAP group. (B) Bar graph showing the top gene ontology (GO) terms of the upregulated genes between MGT+DMSO group and

MGT+IMAP group. (C) Bar graph showing the top GO terms of the downregulated genes between MGT+DMSO group and MGT+IMAP group. (D) Heat map showing representative immune response related genes expression between MGT+DMSO group and MGT+IMAP group two weeks after MGT infection. (E) Bar graph for GO molecular function analysis terms of IMAP down-regulated immune related genes compared with MGT+DMSO group.

Figure S3. IMAP enhance cardiac reprogramming by overcoming the barriers of specific C-C chemokine signaling pathways

(A) Representative images of immunofluorescence staining and (B) Quantification of cardiac markers  $\alpha$ -MHC-GFP (Green) and  $\alpha$ -actinin (Red) in NCFs (Control) or cells treated with either MGT+DMSO or MGT+3i for two weeks. (scale bar 500 $\mu$ m) (C) Bar graph representing major cardiac and fibroblast genes as determined by qPCR in MEFs after two weeks of reprogramming and indicated C-C chemokine ligands treatment. (D) Bar graph representing major cardiac and fibroblast genes as determined by qPCR in MEFs with indicated chemicals and C-C chemokine ligands treatment. Error bars indicate mean  $\pm$ s.e.m.; \*P<0.05; \*\*P<0.01; \*\*\*P<0.001 compared with MGT+DMSO group.

Movie 1. Showing spontaneous beating of iCMs derived from neonatal cardiac fibroblasts (NCFs) in MGT+IMAP group group;

Movie 2. Showing spontaneous beating of iCMs derived from NCFs in MGT+DMSO group group;

Movie 3. Showing calcium transient activities in MGT+IMAP group using Rhod3 staining;

Movie 4. Showing calcium transient activities in MGT+DMSO group using Rhod3 staining;

Movie 5. Lineage-tracing system showing spontaneous beating of iCMs derived from NCFs in MGT+IMAP group under bright field of microscope.

Movie 6. Lineage-tracing system showing spontaneous beating of iCMs (green) derived from NCFs in MGT+IMAP group under fluorescence microscope.

Movie 7. Showing calcium transient activities in MGT+IMAP group using  $\alpha$ MHC-Cre/Rosa26A-Flox-Stop-Flox-GCaMP3 NCFs.

Movie 8. Showing calcium transient activities in MGT+DMSO group using  $\alpha$ MHC-Cre/Rosa26A-Flox-Stop-Flox-GCaMP3 NCFs.

Figure S1

**A**

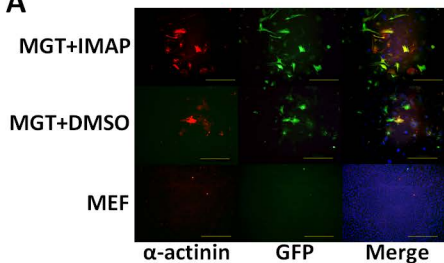

**C**

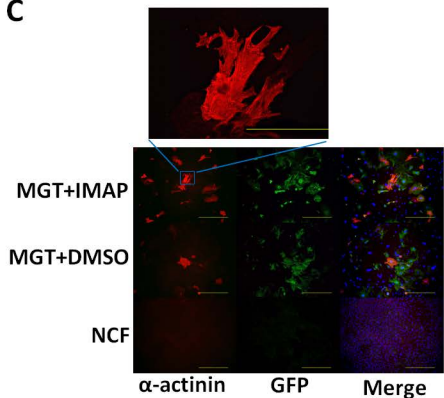

**E**

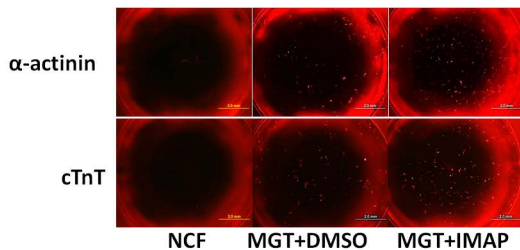

**B**

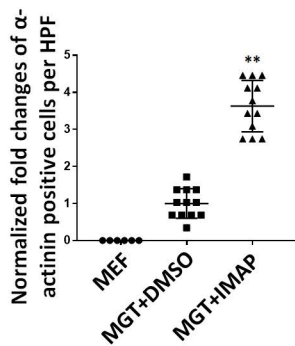

**D**

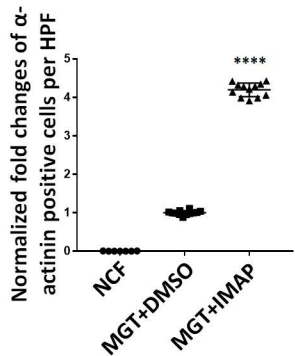

Figure S2

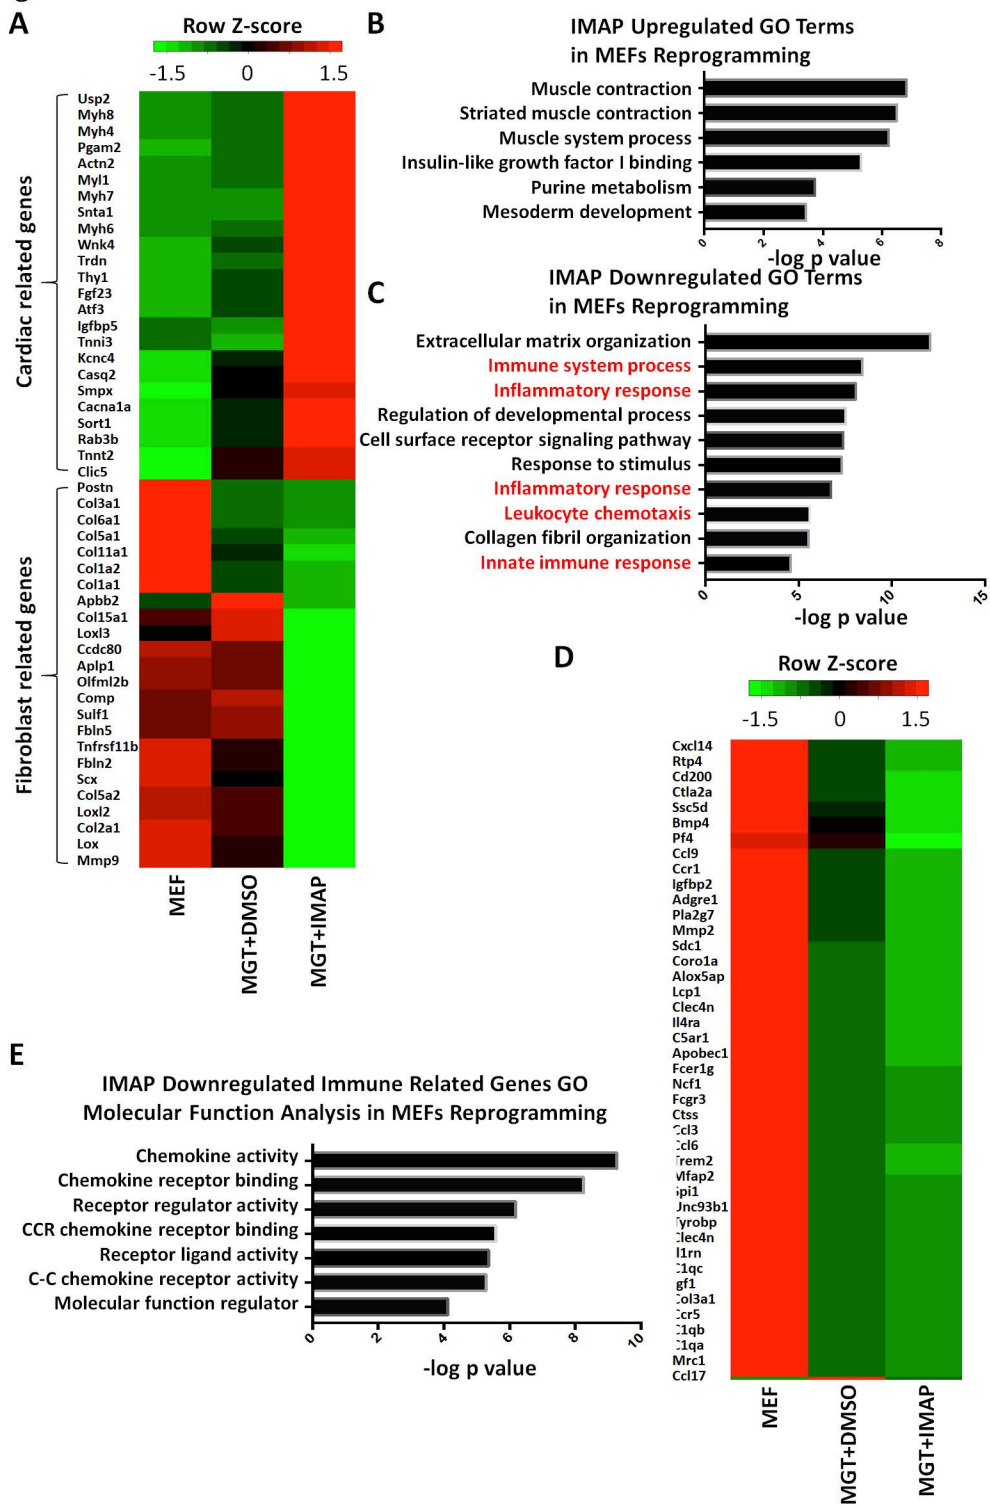

Figure S3

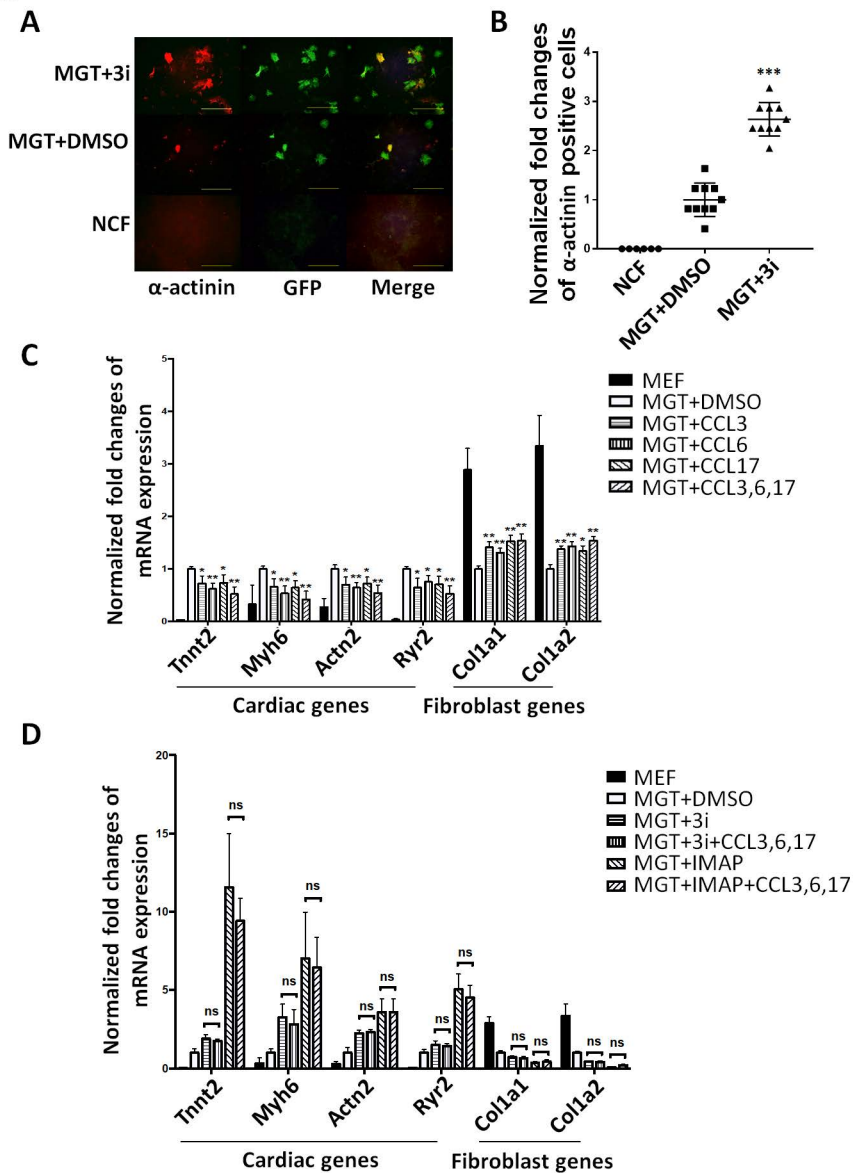

Supplement: supp_RA118.006000_140978_3_supp_318817_pqcf2n.pdf [file supp_RA118.006000_140978_3_supp_318817_pqcf2n.pdf]
